# Supplementary material for: Characterization of New Isolates of Apricot vein clearing-associated virus and of a New Prunus-Infecting Virus: Evidence for Recombination as a Driving Force in Betaflexiviridae Evolution
Source: PubMed Central journal article supplement (PMC4472227; doi:10.1371/journal.pone.0129469), 2015-06-18
Supplement: pone.0129469.s003.pdf [file pone.0129469.s003.pdf]

1 2 3 4 5 6 7 L

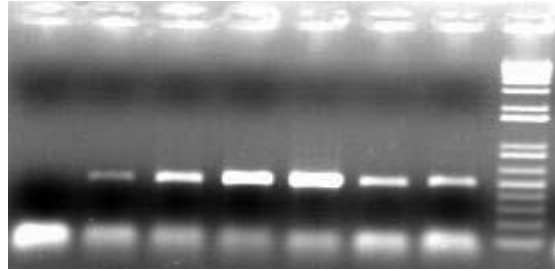

← 499 bp
